# Supplementary material for: Dendritic catalysts for asymmetric transfer hydrogenation
Source: Royal Society of Chemistry journal article supplement (doi:10.1039/b104160f), 2001-01-01
Supplement: b104160f.doc [file b104160f.doc]

# Supplementary data

1. Reagents and conditions for the synthesis of dendritic ligands and their characterisation:

(*S*,*S*)-**1**: 1H NMR (CDCl3, 300 MHz), **: 7.340((d, J=8.7 Hz, 2H, C6*H*4), 7.167-6.786(m, 10H, Ph*H*), 6.436(d, J=8.7 Hz, 2H, C6*H*4), 5.893(s, 1H, N*H*), 5.301(d, J=7.8 Hz, N*H*), 4.789(t, J=9.0 Hz, 1H, NC*H*), 4.496(t, J=8.4 Hz, 1H, NC*H*), 1.466(s, 9H, C*H*3) ppm.

[]20D= +13.0 (c=0.50, CH2Cl2);* []20D= -35.4 (c=0.60, C2H5OH).

API-ES MS: 506.2[M+K]+ (5), 490.3[M+Na]+ (60), 368.3[M-99 (Boc)]+ (100).

(*S*,*S*)-**3**: 1H NMR (CDCl3, 300 MHz), **: 7.670(d, J=8.7 Hz, 2H, C6*H*4), 7.610(d, J=8.1 Hz, 2H, C6*H*4), 7.474-7.029(m, 22H, Ph*H* and C6*H*3), 6.787(s, 1H, C6*H*3), 5.078(s, 4H, PhC*H*2O), 4.613-4.607(m, 1H, NC*H*), 4.399-4.409(m, 1H, NC*H*) ppm.

[]20D= +3.5 (c=0.15, CH2Cl2).*

ESI-HRMS: C41H37N3O5S (Cacld. 683.2454), Found 684.2429 [M+H]+.

(*S*,*S*)-**4**: 1H NMR (CDCl3, 300 MHz), **: 7.592-7.314(m, 24H, C6*H*4, Ph*H*), 7.159-7.119(m, 10H, Ph*H*), 6.752-6.428(m, 9H, C6*H*3), 5.027, 5.012 (s2, 12H, PhC*H*2O ), 4.460-4.455(m, 1H, NC*H*), 4.228-4.400(m, 1H, NC*H*) ppm.

[]20D= -25.2 (c=0.55, CH2Cl2); []20D=280.

ESI-HRMS: C69H61N3O9S (Cacld. 1107.4129), Found 1108.4179 [M+H]+.

(*S*,*S*)-**5**: 1H NMR (CDCl3, 300 MHz), **: 7.617-7.177(m, 54H, C6*H*4, Ph*H*), 7.071-7.535(m, 21H, C6*H*3), 4.999-4.880(m, 28H, PhC*H*2O ), 4.079-4.040(m, 2H, NC*H*) ppm.

[]20D= -13.1 (c=0.50, CH2Cl2); []20D=256.

ESI-HRMS: C125H109N3O17S (Cacld. 1955.7478), Found 1956.7929 [M+H]+.

(*S*,*S*)-**6:** 1H NMR (CDCl3, 400 MHz), **: 7.417-7.180(m, 94H, C6*H*4, Ph*H*), 7.807-6.483(m, 45H, C6*H*3), 5.072-4.818(m, 60H, PhC*H*2O ) ppm, the two NC*H*sof DPEN are too small to be detected.

[]20D= -6.6 (c=0.62, CH2Cl2); []20D=243.

MS (MALDI-TOF): C237H205N3O33S (Cacld. 3652.42), Found 3692.01 [M+K]+, 3676.03 [M+Na]+.


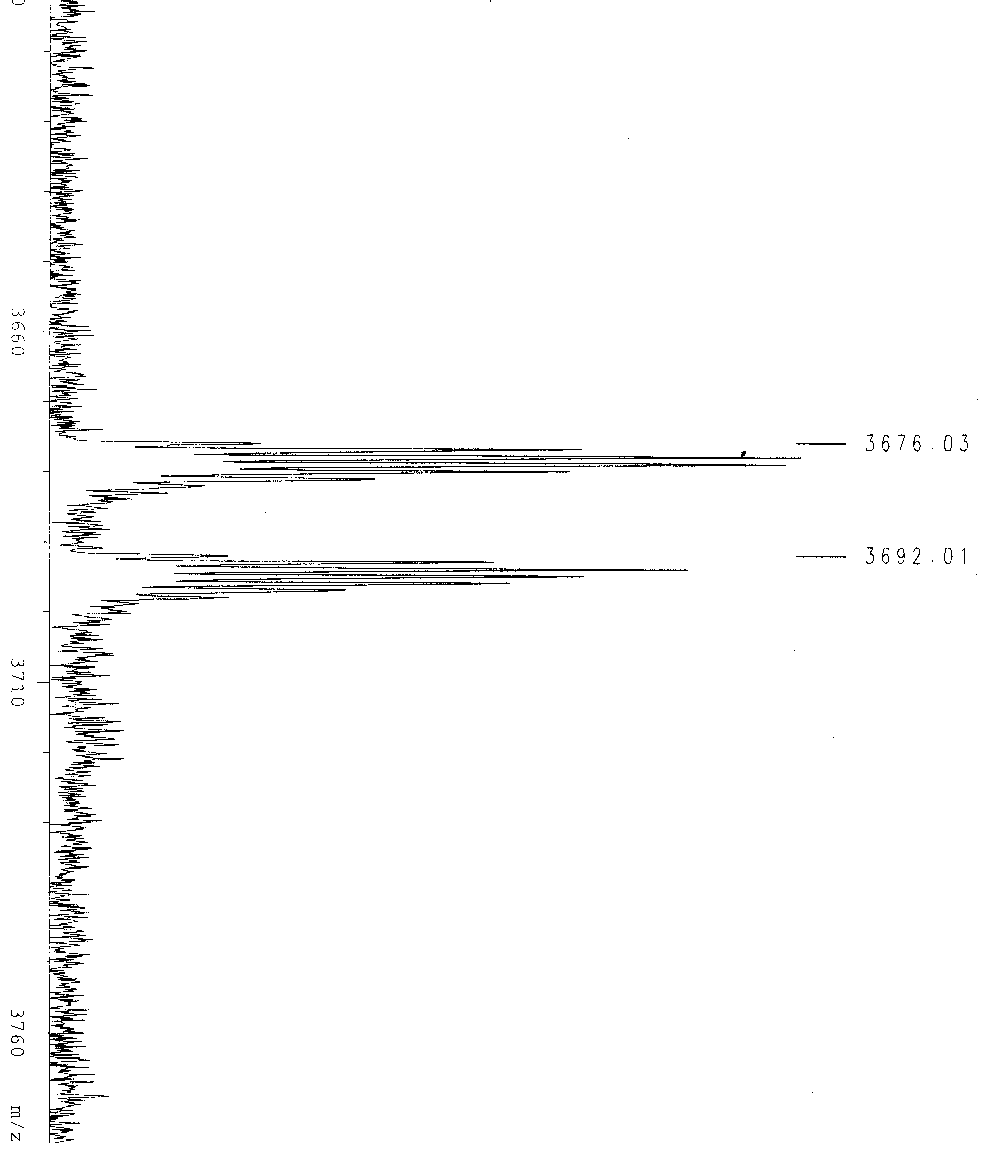


Fig. MALDI-TOF-MS spectrum of (*S*,*S*)-**6**.

* The sign of the specific rotation reverted from the second generation ligand (*S*,*S*)-**4**, also see: *Tetrahedron Lett.* **1998**, *39*, 3783, and references therein.

1. General procedure for recycling reaction using Ru(*S*,*S*)-**5** or Ru(*S*,*S*)-**6** catslyst:

The *firs*t use: Dendritic ligand (0.0044 mmol), [RuCl2(cymene)]2 (0.002 mmol) and triethylamine (0.008 mmol) was stirred in dry DCM (0.2 mL) for 1 h under argon at 28C. Then acetophenone (0.4 mmol) and formic acid/triethylamine azeotrope (0.2 mL) was added and the mixture was stirred at 28C for 20h. (*Caution*: An outlet for the gases produced was important!). DCM was removed under reduced pressure and dry methanol (1.5 mL) was added. Centrifuged (1000 r/min) for 10 min and the solution was removed with syringe. The precipitated catalyst was washed with methanol (1 mL) and dried under vacuum.

The *recycling* use: DCM (0.2 mL), acetophenone (0.4 mmol) and formic acid/triethylamine azeotrope (0.2 mL) was added in turn to the recovered catalyst and the mixture was stirred at 28C for the given time.

1. Time-dependent conversion of acetophenone catalysed by dendritic catalysts
